# Supplementary material for: Loss of microRNA-135b Enhances Bone Metastasis in Prostate Cancer and Predicts Aggressiveness in Human Prostate Samples
Source: MDPI journal article supplement (doi:10.3390/cancers13246202), 2021-12-09
Supplement: s1 [file s1]

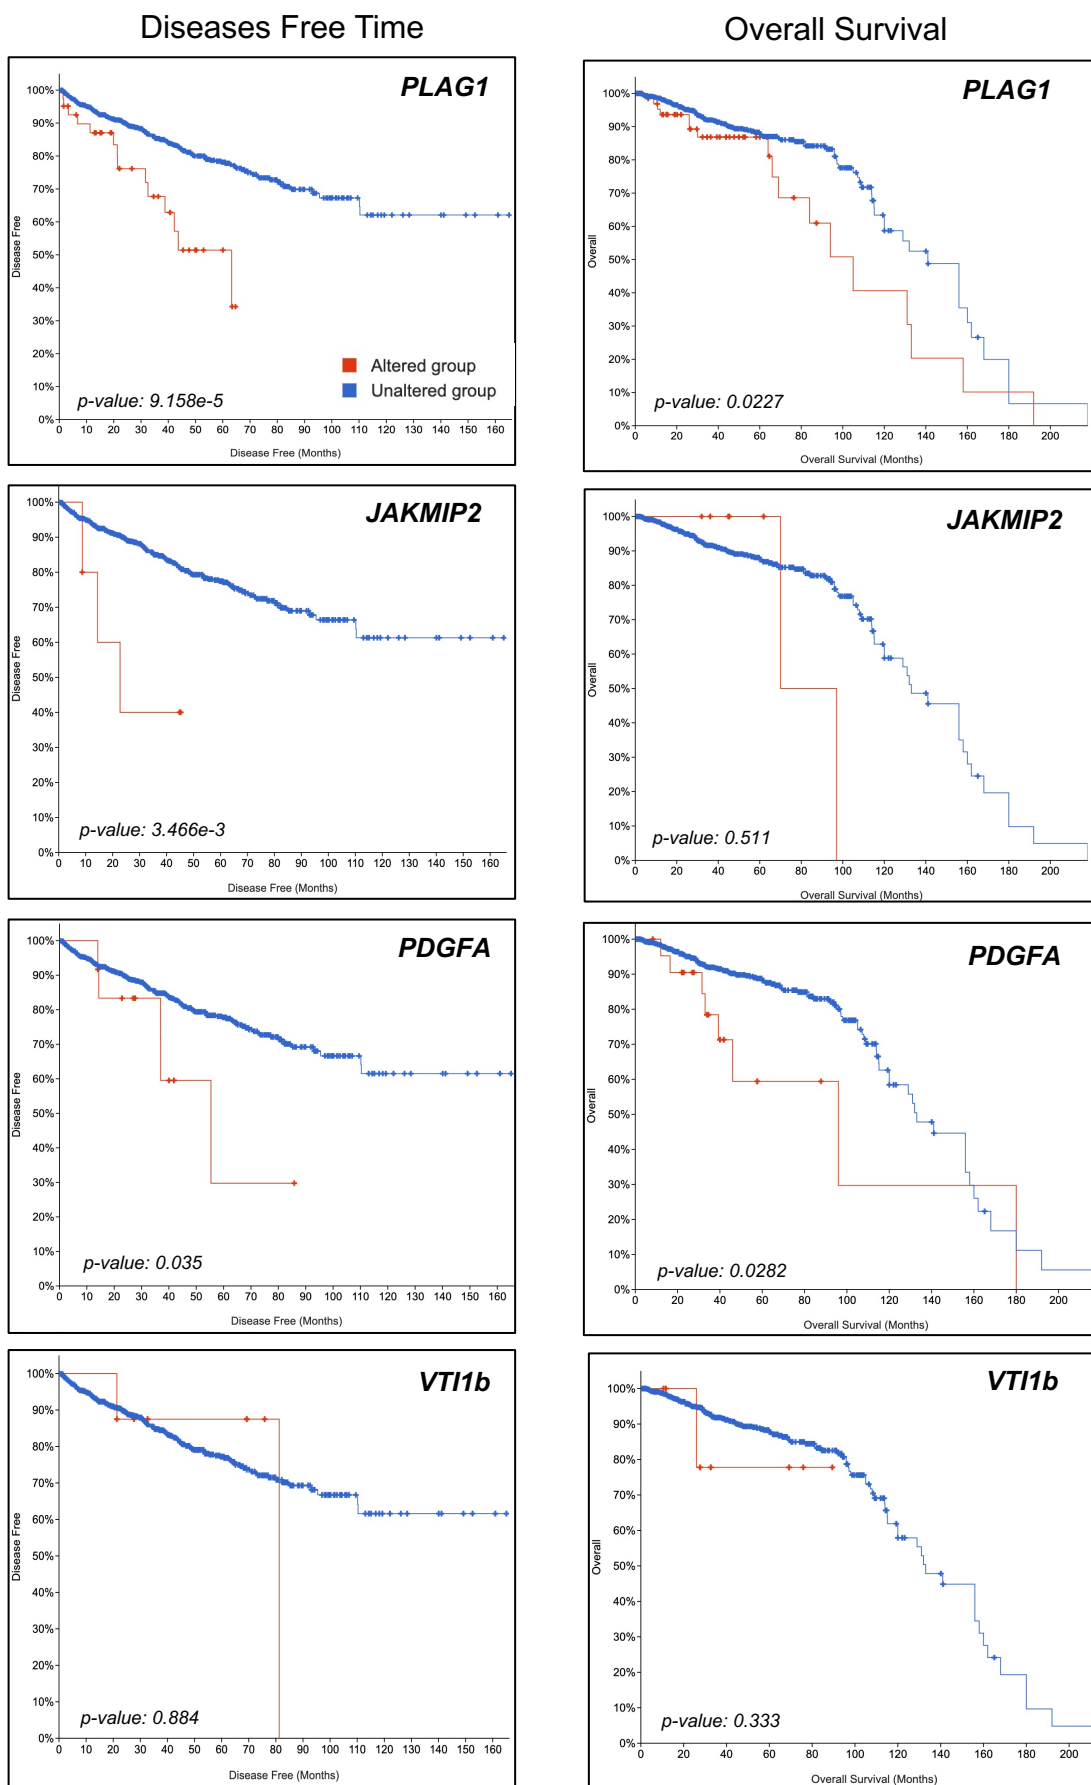

**Figure S1.** Correlation between diseases free time (in months) and overall survival with the expression levels of miR-135b validated targets. Patients' data were retrieved from different prostate cancer studies and TCGA Repository using the cBioportal Visualization platform.
